# Supplementary material
Source: HighWire-hosted journal article supplement (https://cmaj.ca/highwire/filestream/148477/field_highwire_adjunct_files/0/221673-image-1-at.pdf)
Supplement: 221673-image-1-at.pdf [file 221673-image-1-at.pdf]

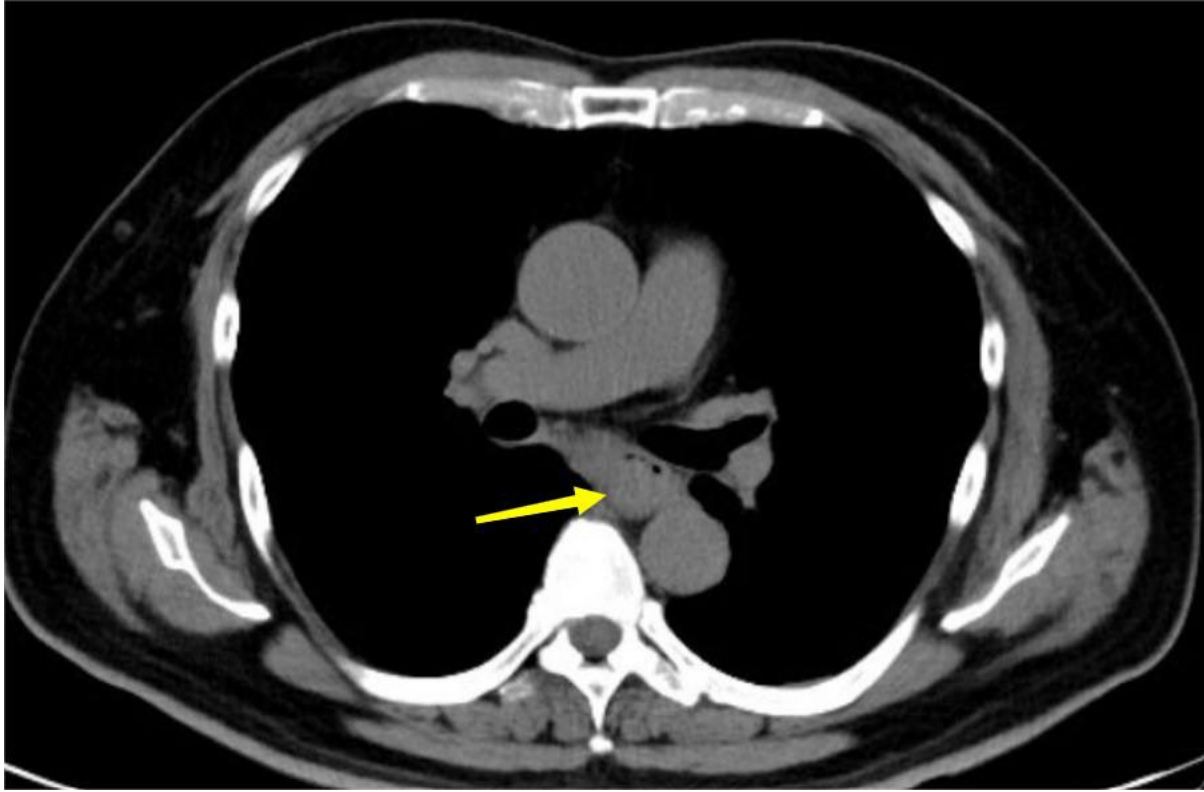

Appendix Figure. CT scan showing a longitudinal, variable density intraluminal mass in the esophagus (arrow).
